# Supplementary material for: Exclusive breastfeeding lowers the odds of childhood diarrhea and other medical conditions: evidence from the 2016 Ethiopian demographic and health survey
Source: Springer Nature journal article supplement (doi:10.1186/s13052-021-01115-3), 2021-08-03
Supplement: MOESM1 [file 19538150]

SECTION 6. CHILD HEALTH AND NUTRITION

| NO. | QUESTIONS AND FILTERS                                                                                                                                                                                                                                                                                                                                                                                                                                                                                                                                                                                                                                                                           | LAST BIRTH<br>NAME _____                                                                                                                                                                     | NEXT-TO-LAST BIRTH<br>NAME _____                                                                                                                                                             |
|-----|-------------------------------------------------------------------------------------------------------------------------------------------------------------------------------------------------------------------------------------------------------------------------------------------------------------------------------------------------------------------------------------------------------------------------------------------------------------------------------------------------------------------------------------------------------------------------------------------------------------------------------------------------------------------------------------------------|----------------------------------------------------------------------------------------------------------------------------------------------------------------------------------------------|----------------------------------------------------------------------------------------------------------------------------------------------------------------------------------------------|
| 609 | <p>CHECK 464: EVER BREASTFED?</p> <p>YES <input type="checkbox"/>      NO <input type="checkbox"/></p> <p>a) Now I would like to know how much (NAME) was given to drink during the diarrhea including breastmilk. Was (NAME) given less than usual to drink, about the same amount, or more than usual to drink?</p> <p>IF LESS, PROBE: Was (NAME) given much less than usual to drink or somewhat less?</p> <p>b) Now I would like to know how much (NAME) was given to drink during the diarrhea. Was (NAME) given less than usual to drink, about the same amount, or more than usual to drink?</p> <p>IF LESS, PROBE: Was (NAME) given much less than usual to drink or somewhat less?</p> | <p>MUCH LESS ..... 1</p> <p>SOMEWHAT LESS ..... 2</p> <p>ABOUT THE SAME ..... 3</p> <p>MORE ..... 4</p> <p>NOTHING TO DRINK ..... 5</p> <p>DON'T KNOW ..... 8</p>                            | <p>MUCH LESS ..... 1</p> <p>SOMEWHAT LESS ..... 2</p> <p>ABOUT THE SAME ..... 3</p> <p>MORE ..... 4</p> <p>NOTHING TO DRINK ..... 5</p> <p>DON'T KNOW ..... 8</p>                            |
| 610 | <p>When (NAME) had diarrhea, was (NAME) given less than usual to eat, about the same amount, more than usual, or nothing to eat?</p> <p>IF LESS, PROBE: Was (NAME) given much less than usual to eat or somewhat less?</p>                                                                                                                                                                                                                                                                                                                                                                                                                                                                      | <p>MUCH LESS ..... 1</p> <p>SOMEWHAT LESS ..... 2</p> <p>ABOUT THE SAME ..... 3</p> <p>MORE ..... 4</p> <p>STOPPED FOOD ..... 5</p> <p>NEVER GAVE FOOD ..... 6</p> <p>DON'T KNOW ..... 8</p> | <p>MUCH LESS ..... 1</p> <p>SOMEWHAT LESS ..... 2</p> <p>ABOUT THE SAME ..... 3</p> <p>MORE ..... 4</p> <p>STOPPED FOOD ..... 5</p> <p>NEVER GAVE FOOD ..... 6</p> <p>DON'T KNOW ..... 8</p> |
| 611 | <p>Did you seek advice or treatment for the diarrhea from any source?</p>                                                                                                                                                                                                                                                                                                                                                                                                                                                                                                                                                                                                                       | <p>YES ..... 1</p> <p>NO ..... 2</p> <p>(SKIP TO 615) ←</p>                                                                                                                                  | <p>YES ..... 1</p> <p>NO ..... 2</p> <p>(SKIP TO 615) ←</p>                                                                                                                                  |

SECTION 6. CHILD HEALTH AND NUTRITION

| NO. | QUESTIONS AND FILTERS                                                                                                                                                                                                                                                                                 | LAST BIRTH |                                                                                                                                                                                                                                                                                                                                                                                                                 |  | NEXT-TO-LAST BIRTH                                                                                                                                                                                                                                                                                                                                                                                              |  |  |
|-----|-------------------------------------------------------------------------------------------------------------------------------------------------------------------------------------------------------------------------------------------------------------------------------------------------------|------------|-----------------------------------------------------------------------------------------------------------------------------------------------------------------------------------------------------------------------------------------------------------------------------------------------------------------------------------------------------------------------------------------------------------------|--|-----------------------------------------------------------------------------------------------------------------------------------------------------------------------------------------------------------------------------------------------------------------------------------------------------------------------------------------------------------------------------------------------------------------|--|--|
|     |                                                                                                                                                                                                                                                                                                       | NAME _____ |                                                                                                                                                                                                                                                                                                                                                                                                                 |  | NAME _____                                                                                                                                                                                                                                                                                                                                                                                                      |  |  |
| 615 | <p>Was (NAME) given any of the following at any time since (NAME) started having the diarrhea:</p> <p>a) A fluid made from a special packet called LEMLEM?</p> <p>b) A government-recommended homemade fluid?</p> <p>c) Zinc tablets or syrup?</p>                                                    |            | <p>YES NO DK</p> <p>a) FLUID FROM ORS PACKET .. 1 2 8</p> <p>b) HOMEMADE FLUID ..... 1 2 8</p> <p>c) ZINC ..... 1 2 8</p>                                                                                                                                                                                                                                                                                       |  | <p>YES NO DK</p> <p>a) FLUID FROM ORS PACKET .. 1 2 8</p> <p>b) HOMEMADE FLUID ..... 1 2 8</p> <p>c) ZINC ..... 1 2 8</p>                                                                                                                                                                                                                                                                                       |  |  |
| 616 | <p>CHECK 615:</p> <p>ANY 'YES' <input type="checkbox"/> ↓</p> <p>a) Was anything else given to treat the diarrhea?</p> <p>ALL 'NO' OR 'DK' <input type="checkbox"/> ↓</p> <p>b) Was anything given to treat the diarrhea?</p>                                                                         |            | <p>YES ..... 1</p> <p>NO ..... 2</p> <p>(SKIP TO 618) ←</p> <p>DON'T KNOW ..... 8</p>                                                                                                                                                                                                                                                                                                                           |  | <p>YES ..... 1</p> <p>NO ..... 2</p> <p>(SKIP TO 618) ←</p> <p>DON'T KNOW ..... 8</p>                                                                                                                                                                                                                                                                                                                           |  |  |
| 617 | <p>CHECK 615:</p> <p>ANY 'YES' <input type="checkbox"/> ↓</p> <p>a) What else was given to treat the diarrhea?</p> <p>Anything else?</p> <p>ALL 'NO' OR 'DK' <input type="checkbox"/> ↓</p> <p>b) What was given to treat the diarrhea?</p> <p>Anything else?</p> <p>RECORD ALL TREATMENTS GIVEN.</p> |            | <p><b>PILL OR SYRUP</b></p> <p>ANTIBIOTIC ..... A</p> <p>ANTIMOTILITY ..... B</p> <p>OTHER (NOT ANTIBIOTIC OR ANTIMOTILITY) ..... C</p> <p>UNKNOWN PILL OR SYRUP ..... D</p> <p><b>INJECTION</b></p> <p>ANTIBIOTIC ..... E</p> <p>NON-ANTIBIOTIC ..... F</p> <p>UNKNOWN INJECTION ..... G</p> <p>(IV) INTRAVENOUS ..... H</p> <p>HOME REMEDY/ HERBAL MEDICINE ..... I</p> <p>OTHER _____ X</p> <p>(SPECIFY)</p> |  | <p><b>PILL OR SYRUP</b></p> <p>ANTIBIOTIC ..... A</p> <p>ANTIMOTILITY ..... B</p> <p>OTHER (NOT ANTIBIOTIC OR ANTIMOTILITY) ..... C</p> <p>UNKNOWN PILL OR SYRUP ..... D</p> <p><b>INJECTION</b></p> <p>ANTIBIOTIC ..... E</p> <p>NON-ANTIBIOTIC ..... F</p> <p>UNKNOWN INJECTION ..... G</p> <p>(IV) INTRAVENOUS ..... H</p> <p>HOME REMEDY/ HERBAL MEDICINE ..... I</p> <p>OTHER _____ X</p> <p>(SPECIFY)</p> |  |  |
| 618 | <p>Has (NAME) been ill with a fever at any time in the last 2 weeks?</p>                                                                                                                                                                                                                              |            | <p>YES ..... 1</p> <p>NO ..... 2</p> <p>DON'T KNOW ..... 8</p>                                                                                                                                                                                                                                                                                                                                                  |  | <p>YES ..... 1</p> <p>NO ..... 2</p> <p>DON'T KNOW ..... 8</p>                                                                                                                                                                                                                                                                                                                                                  |  |  |
| 620 | <p>Has (NAME) had an illness with a cough at any time in the last 2 weeks?</p>                                                                                                                                                                                                                        |            | <p>YES ..... 1</p> <p>NO ..... 2</p> <p>DON'T KNOW ..... 8</p>                                                                                                                                                                                                                                                                                                                                                  |  | <p>YES ..... 1</p> <p>NO ..... 2</p> <p>DON'T KNOW ..... 8</p>                                                                                                                                                                                                                                                                                                                                                  |  |  |
| 621 | <p>Has (NAME) had fast, short, rapid breaths or difficulty breathing at any time in the last 2 weeks?</p>                                                                                                                                                                                             |            | <p>YES ..... 1</p> <p>NO ..... 2</p> <p>(SKIP TO 623) ←</p> <p>DON'T KNOW ..... 8</p>                                                                                                                                                                                                                                                                                                                           |  | <p>YES ..... 1</p> <p>NO ..... 2</p> <p>(SKIP TO 623) ←</p> <p>DON'T KNOW ..... 8</p>                                                                                                                                                                                                                                                                                                                           |  |  |
